# Supplementary material for: Correlation of three-liquid-phase equilibria involving ionic liquids
Source: Royal Society of Chemistry journal article supplement (doi:10.1039/c6cp03467e), 2016-01-01
Supplement: c6cp03467e1.pdf [file c6cp03467e1.pdf]

### SUPPLEMENTARY MATERIAL

Table S1. LLE and LLLE data for the ternary system water + [P<sub>66614</sub>][DCA] + hexane at T = 298.15 K and 0.1 MPa (mass fractions).

| Biphasic region I   |                     |                     |                     |                     |                     |                     |                     |                     |
|---------------------|---------------------|---------------------|---------------------|---------------------|---------------------|---------------------|---------------------|---------------------|
| Upper Phase         |                     |                     | Lower Phase         |                     |                     |                     |                     |                     |
| $\omega_1$          | $\omega_2$          | $\omega_3$          | $\omega_1$          | $\omega_2$          | $\omega_3$          | $\omega_1$          | $\omega_2$          | $\omega_3$          |
| 0.030               | 0.970               | 0.000               | 1.000               | 0.000               | 0.000               | 0.000               | 0.000               | 0.000               |
| 0.027               | 0.957               | 0.016               | 1.000               | 0.000               | 0.000               | 0.000               | 0.000               | 0.000               |
| 0.025               | 0.911               | 0.064               | 1.000               | 0.000               | 0.000               | 0.000               | 0.000               | 0.000               |
| 0.024               | 0.847               | 0.130               | 1.000               | 0.000               | 0.000               | 0.000               | 0.000               | 0.000               |
| 0.022               | 0.771               | 0.207               | 1.000               | 0.000               | 0.000               | 0.000               | 0.000               | 0.000               |
| $u(\omega_1)=0.001$ | $u(\omega_2)=0.002$ | $u(\omega_3)=0.002$ | $u(\omega_1)=0.001$ | $u(\omega_2)=0.001$ | $u(\omega_3)=0.001$ | $u(\omega_1)=0.001$ | $u(\omega_2)=0.001$ | $u(\omega_3)=0.001$ |
| Biphasic region II  |                     |                     |                     |                     |                     |                     |                     |                     |
| Upper Phase         |                     |                     | Lower Phase         |                     |                     |                     |                     |                     |
| $\omega_1$          | $\omega_2$          | $\omega_3$          | $\omega_1$          | $\omega_2$          | $\omega_3$          | $\omega_1$          | $\omega_2$          | $\omega_3$          |
| 0.000               | 0.000               | 1.000               | 0.000               | 0.709               | 0.291               | 0.000               | 0.709               | 0.291               |
| 0.000               | 0.000               | 1.000               | 0.009               | 0.717               | 0.274               | 0.000               | 0.717               | 0.274               |
| $u(\omega_1)=0.001$ | $u(\omega_2)=0.001$ | $u(\omega_3)=0.001$ | $u(\omega_1)=0.001$ | $u(\omega_2)=0.002$ | $u(\omega_3)=0.002$ | $u(\omega_1)=0.001$ | $u(\omega_2)=0.002$ | $u(\omega_3)=0.002$ |
| Triphasic region    |                     |                     |                     |                     |                     |                     |                     |                     |
| Upper Phase         |                     |                     | Medium Phase        |                     |                     | Lower Phase         |                     |                     |
| $\omega_1$          | $\omega_2$          | $\omega_3$          | $\omega_1$          | $\omega_2$          | $\omega_3$          | $\omega_1$          | $\omega_2$          | $\omega_3$          |
| 0.000               | 0.000               | 1.000               | 0.020               | 0.724               | 0.255               | 1.000               | 0.000               | 0.000               |
| $u(\omega_1)=0.001$ | $u(\omega_2)=0.001$ | $u(\omega_3)=0.001$ | $u(\omega_1)=0.001$ | $u(\omega_2)=0.002$ | $u(\omega_3)=0.002$ | $u(\omega_1)=0.001$ | $u(\omega_2)=0.001$ | $u(\omega_3)=0.001$ |

Standard uncertainties:  $u(P) = 5$  kPa,  $u(T) = 0.05$  K.

Table S2. LLE and LLLE data for the ternary system water + [P<sub>66614</sub>][DCA] + hexane at T = 323.15 K and 0.1 MPa (mass fractions).

| Biphasic region I   |                     |                     |                     |                     |                     |                     |                     |                     |
|---------------------|---------------------|---------------------|---------------------|---------------------|---------------------|---------------------|---------------------|---------------------|
| Upper Phase         |                     |                     | Lower Phase         |                     |                     |                     |                     |                     |
| $\omega_1$          | $\omega_2$          | $\omega_3$          | $\omega_1$          | $\omega_2$          | $\omega_3$          | $\omega_1$          | $\omega_2$          | $\omega_3$          |
| 0.032               | 0.968               | 0.000               | 1.000               | 0.000               | 0.000               | 0.000               | 0.000               | 0.000               |
| 0.025               | 0.953               | 0.022               | 1.000               | 0.000               | 0.000               | 0.000               | 0.000               | 0.000               |
| 0.020               | 0.891               | 0.089               | 1.000               | 0.000               | 0.000               | 0.000               | 0.000               | 0.000               |
| 0.019               | 0.830               | 0.151               | 1.000               | 0.000               | 0.000               | 0.000               | 0.000               | 0.000               |
| 0.020               | 0.730               | 0.250               | 1.000               | 0.000               | 0.000               | 0.000               | 0.000               | 0.000               |
| $u(\omega_1)=0.001$ | $u(\omega_2)=0.002$ | $u(\omega_3)=0.002$ | $u(\omega_1)=0.001$ | $u(\omega_2)=0.001$ | $u(\omega_3)=0.001$ | $u(\omega_1)=0.001$ | $u(\omega_2)=0.001$ | $u(\omega_3)=0.001$ |
| Biphasic region II  |                     |                     |                     |                     |                     |                     |                     |                     |
| Upper Phase         |                     |                     | Lower Phase         |                     |                     |                     |                     |                     |
| $\omega_1$          | $\omega_2$          | $\omega_3$          | $\omega_1$          | $\omega_2$          | $\omega_3$          | $\omega_1$          | $\omega_2$          | $\omega_3$          |
| 0.000               | 0.000               | 1.000               | 0.000               | 0.688               | 0.312               | 0.000               | 0.688               | 0.312               |
| 0.000               | 0.000               | 1.000               | 0.003               | 0.694               | 0.303               | 0.000               | 0.694               | 0.303               |
| 0.000               | 0.000               | 1.000               | 0.016               | 0.687               | 0.297               | 0.000               | 0.687               | 0.297               |
| $u(\omega_1)=0.001$ | $u(\omega_2)=0.001$ | $u(\omega_3)=0.001$ | $u(\omega_1)=0.001$ | $u(\omega_2)=0.002$ | $u(\omega_3)=0.002$ | $u(\omega_1)=0.001$ | $u(\omega_2)=0.002$ | $u(\omega_3)=0.002$ |
| Triphasic region    |                     |                     |                     |                     |                     |                     |                     |                     |
| Upper Phase         |                     |                     | Medium Phase        |                     |                     | Lower Phase         |                     |                     |
| $\omega_1$          | $\omega_2$          | $\omega_3$          | $\omega_1$          | $\omega_2$          | $\omega_3$          | $\omega_1$          | $\omega_2$          | $\omega_3$          |
| 0.000               | 0.000               | 1.000               | 0.021               | 0.684               | 0.295               | 1.000               | 0.000               | 0.000               |
| $u(\omega_1)=0.001$ | $u(\omega_2)=0.001$ | $u(\omega_3)=0.001$ | $u(\omega_1)=0.001$ | $u(\omega_2)=0.002$ | $u(\omega_3)=0.002$ | $u(\omega_1)=0.001$ | $u(\omega_2)=0.001$ | $u(\omega_3)=0.001$ |

Standard uncertainties:  $u(P) = 5$  kPa,  $u(T) = 0.05$  K.

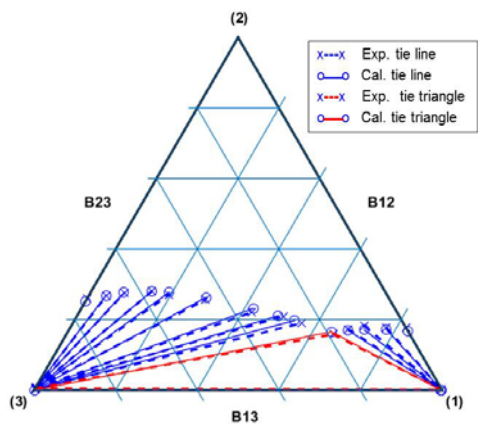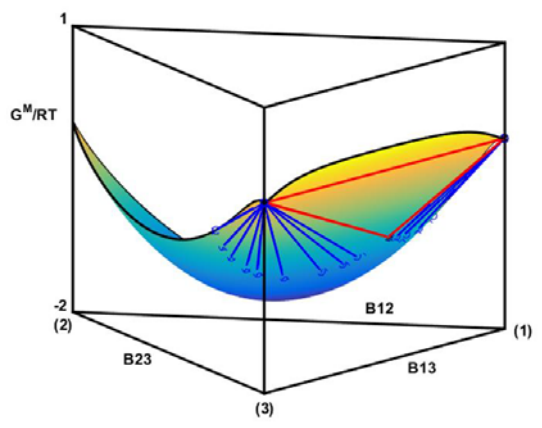

1a)

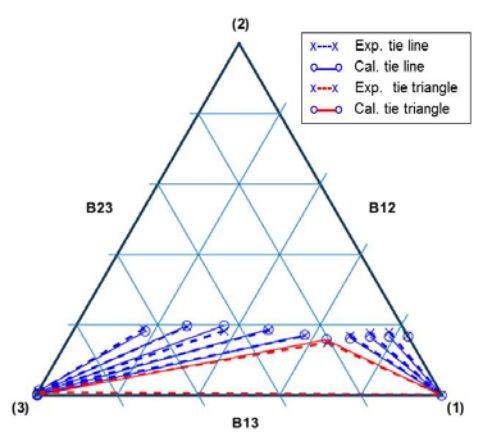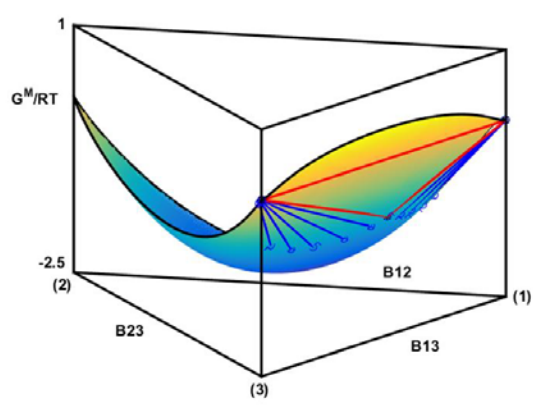

1b)

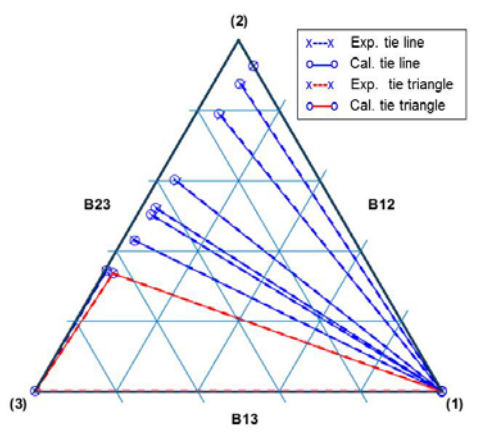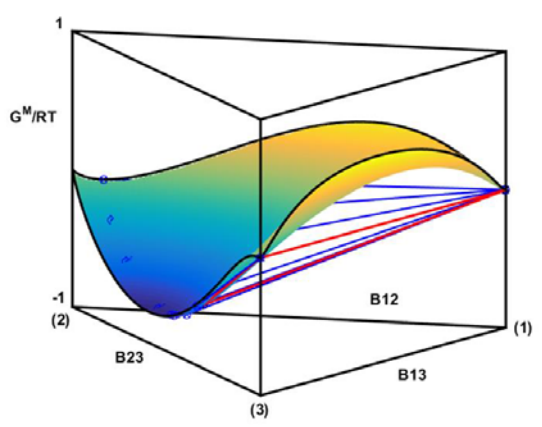

2a)

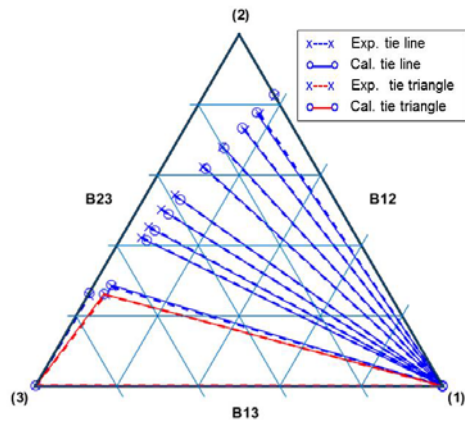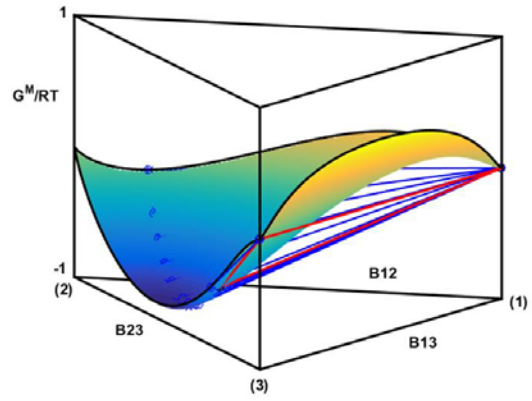

2b)

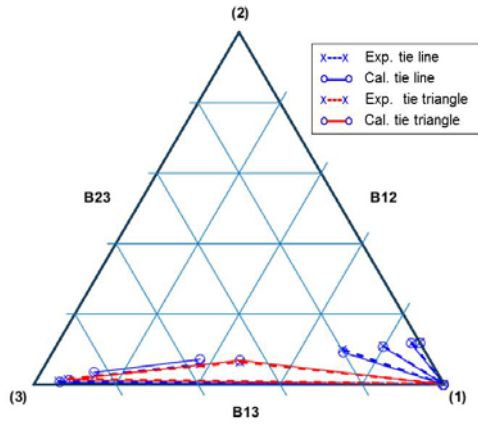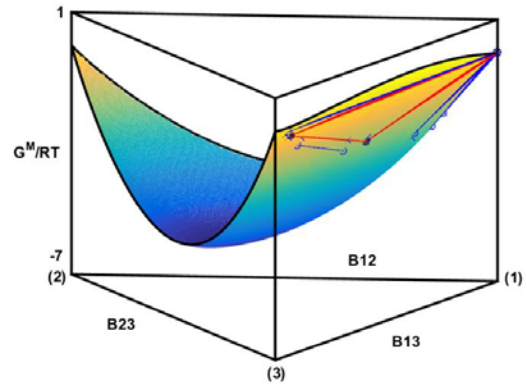

3a)

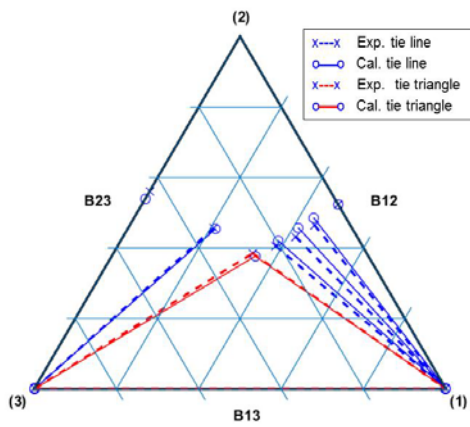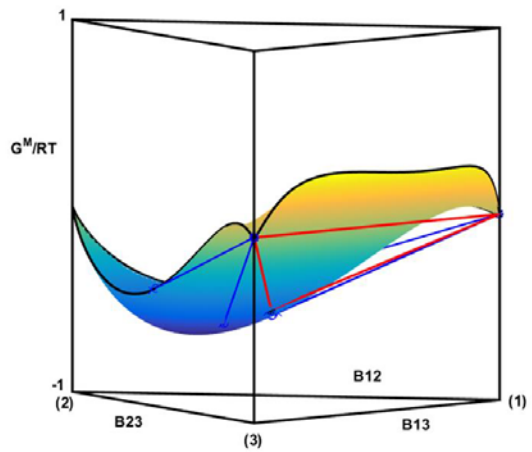

4a)

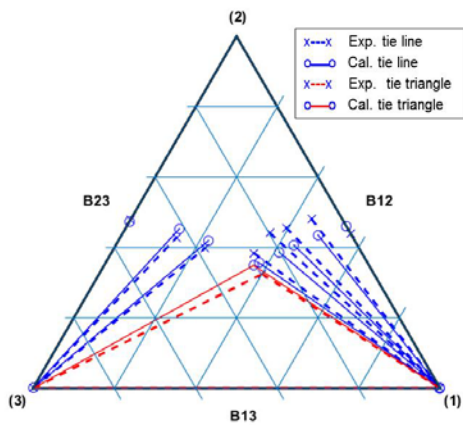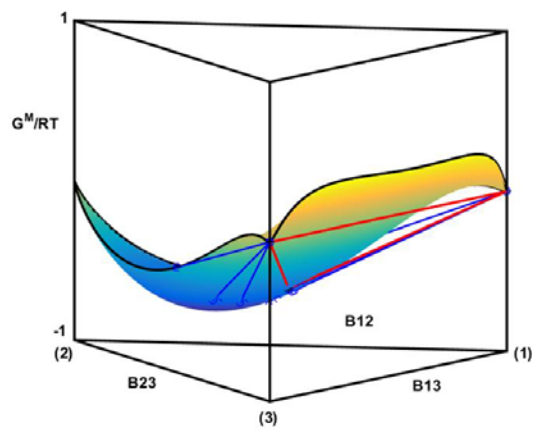

4b)

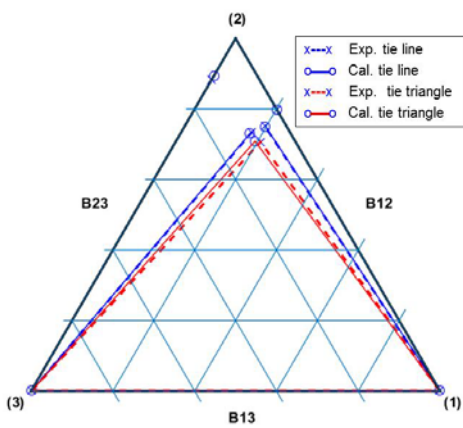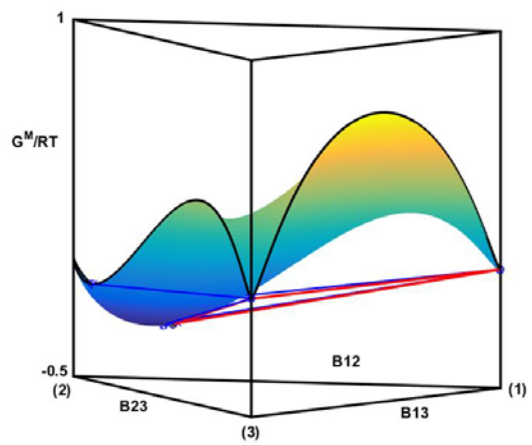

5a)

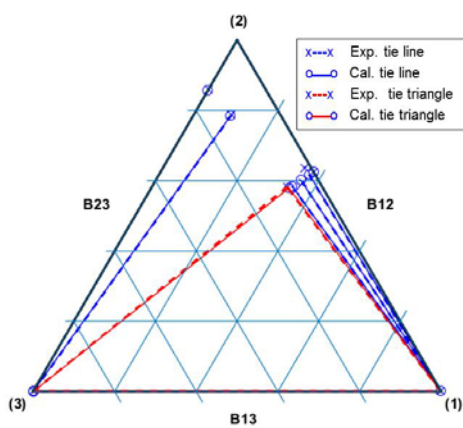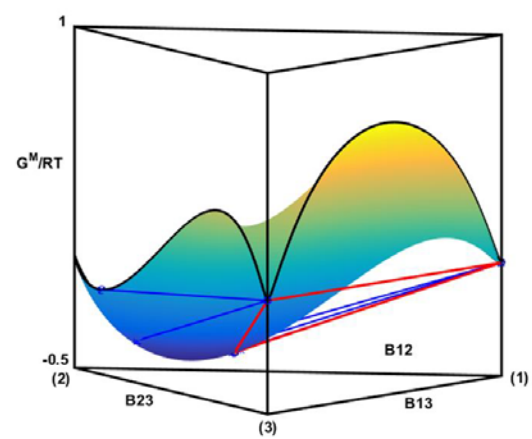

5b)

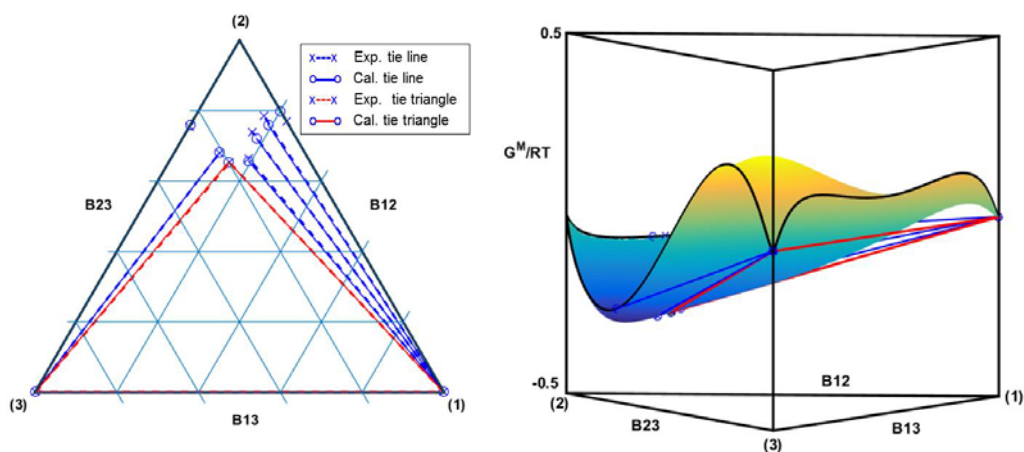

6a)

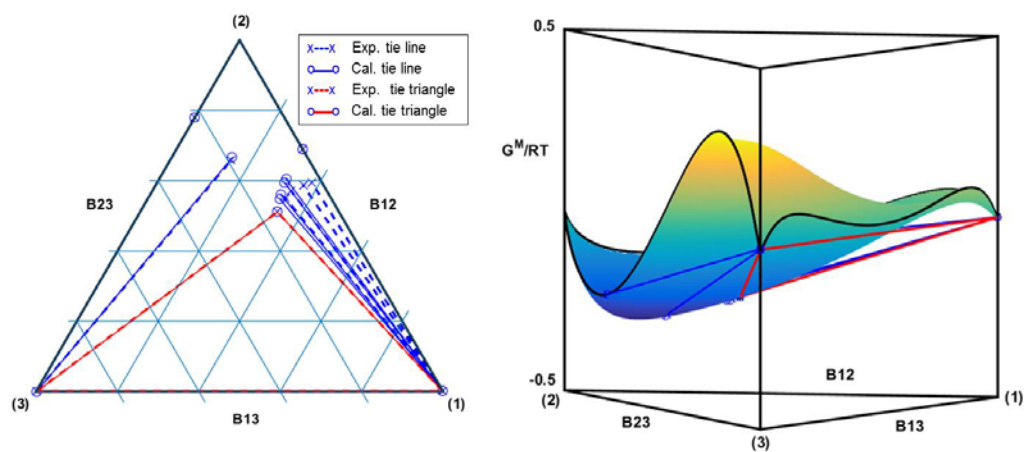

6b)

Figure S1. Experimental and calculated LLE and LLLE (tie-triangle) data (mole fractions) for the systems summarized in Table 4 and the calculated  $G^M/RT$  surface obtained using the NRTL model with parameters given in Table 5 (the tie-lines and the tie-triangle are also drawn on the surface).
